# Supplementary material
Source: publisher figshare collection journal article supplement (https://frontiersin.figshare.com/ndownloader/files/33941660)
Supplement: Supplementary file [file 33941660]

# China Pharmaceutical University

## IRB Approval

Serial Number: CPU2019015

|                                                                                                                                                                                                                                                                                                                                                                                                                                                                                                                                                                                                                                                                                                                                                                                                                                                                                                                                                                                                                                                                                                                                                                                                                                                                                                                                                                                                                                                                                                                                                          |                                                                                                                                       |                  |                                                                                           |
|----------------------------------------------------------------------------------------------------------------------------------------------------------------------------------------------------------------------------------------------------------------------------------------------------------------------------------------------------------------------------------------------------------------------------------------------------------------------------------------------------------------------------------------------------------------------------------------------------------------------------------------------------------------------------------------------------------------------------------------------------------------------------------------------------------------------------------------------------------------------------------------------------------------------------------------------------------------------------------------------------------------------------------------------------------------------------------------------------------------------------------------------------------------------------------------------------------------------------------------------------------------------------------------------------------------------------------------------------------------------------------------------------------------------------------------------------------------------------------------------------------------------------------------------------------|---------------------------------------------------------------------------------------------------------------------------------------|------------------|-------------------------------------------------------------------------------------------|
| Research Project                                                                                                                                                                                                                                                                                                                                                                                                                                                                                                                                                                                                                                                                                                                                                                                                                                                                                                                                                                                                                                                                                                                                                                                                                                                                                                                                                                                                                                                                                                                                         | Clinical Pharmacy China by China Pharmaceutical University                                                                            |                  |                                                                                           |
| Research Categories                                                                                                                                                                                                                                                                                                                                                                                                                                                                                                                                                                                                                                                                                                                                                                                                                                                                                                                                                                                                                                                                                                                                                                                                                                                                                                                                                                                                                                                                                                                                      | Questionnaire Inquiry                                                                                                                 | Applicant        | National Licensed Pharmacist Development Research Center, China Pharmaceutical University |
| Sponsor                                                                                                                                                                                                                                                                                                                                                                                                                                                                                                                                                                                                                                                                                                                                                                                                                                                                                                                                                                                                                                                                                                                                                                                                                                                                                                                                                                                                                                                                                                                                                  | China Pharmaceutical University                                                                                                       | Date             | April 30, 2018                                                                            |
| Principal Investigator                                                                                                                                                                                                                                                                                                                                                                                                                                                                                                                                                                                                                                                                                                                                                                                                                                                                                                                                                                                                                                                                                                                                                                                                                                                                                                                                                                                                                                                                                                                                   | Xi Xiaoyu                                                                                                                             | Review Materials | As described in appendix                                                                  |
| Review Channel                                                                                                                                                                                                                                                                                                                                                                                                                                                                                                                                                                                                                                                                                                                                                                                                                                                                                                                                                                                                                                                                                                                                                                                                                                                                                                                                                                                                                                                                                                                                           | Review Conference <input type="checkbox"/> Quick Review <input checked="" type="checkbox"/>                                           |                  |                                                                                           |
| Contact Information of the Ethics Committee                                                                                                                                                                                                                                                                                                                                                                                                                                                                                                                                                                                                                                                                                                                                                                                                                                                                                                                                                                                                                                                                                                                                                                                                                                                                                                                                                                                                                                                                                                              | Address: Science and Technology Department, China Pharmaceutical University, No.24 Tongjia Lane, Nanjing21198,China,Tel: 025-83271487 |                  |                                                                                           |
| Comments from Ethics Committee                                                                                                                                                                                                                                                                                                                                                                                                                                                                                                                                                                                                                                                                                                                                                                                                                                                                                                                                                                                                                                                                                                                                                                                                                                                                                                                                                                                                                                                                                                                           |                                                                                                                                       |                  |                                                                                           |
| <p>After being examined by this Ethics Committee, it is agreed to carry out the research.</p> <p>Comments and Suggestions: None <input checked="" type="checkbox"/> Yes <input type="checkbox"/></p> <p>Will the research be subject to continuous review by Ethics Committee? Yes <input checked="" type="checkbox"/> No <input type="checkbox"/></p> <p>The review frequency is from the date of approval of the study: 3 months <input type="checkbox"/> 6 months <input checked="" type="checkbox"/> 1 year <input type="checkbox"/></p> <p>The Ethics Committee has the power to change the frequency of continuous reviews according to actual progress.</p> <p>Signature of Chairman: 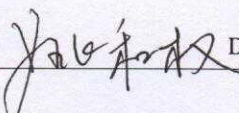 Date: 2018.4.30</p>                                                                                                                                                                                                                                                                                                                                                                                                                                                                                                                                                                                                                                                                                                                                                    |                                                                                                                                       |                  |                                                                                           |
| <p>Note: (Please read carefully)</p> <ol style="list-style-type: none"> <li>The approval document is valid for three years. Please continue to apply beyond the validity period.</li> <li>This approval document will be filed with each central institution and its ethics committee. If the other party has different opinions on the feasibility of your institution (including the qualification and experience of researchers, equipment, conditions, etc.), please contact this Ethics Committee in time.</li> <li>Approved projects shall be implemented in accordance with the plan approved by the Ethics Committee and in line with the principles of CFDA-GCP and the Helsinki Declaration.</li> <li>Suspend/terminate the investigation in advance, please inform the Ethics Committee in time.</li> <li>Please inform the Ethics Committee in time to re-examine any modification of the approved investigation plan, informed consent form and other materials and the replacement of major researchers, and implement them after obtaining approval.</li> <li>If any violation of the experimental scheme is found, the Ethics Committee shall be informed in time.</li> <li>According to the opinion of this Ethics Committee on the frequency of continuous review, whether the experiment starts or not, please apply for continuous review one month before the expiration of the continuous review date.</li> <li>After completing the investigation, please submit the final report for review by this Ethics Committee.</li> </ol> |                                                                                                                                       |                  |                                                                                           |



Appendix

The list of approval materials for the Clinical Pharmacy China by  
China Pharmaceutical University is as follows:

| No.  | Documents                                            | Version/Date |
|------|------------------------------------------------------|--------------|
| 1    | Application Form for Preliminary Examination         | 2018.4       |
| 2    | Registration Form                                    | 2018.4       |
| 3    | Resumes of Main Researchers and List of Participants | 2018.4       |
| 4    | Research Plan                                        | 2018.4       |
| 5    | Informed Consent                                     | 2018.4       |
| 6    | Investigators' Manual Documents                      | 2018.4       |
| 7    | Notes to Investigators' Manual Documents             | 2018.4       |
| 8    | Questionnaire                                        | 2018.4       |
| 9    | Respondents' Manual Documents                        | 2018.4       |
| 10   | Notice of Respondents                                | 2018.4       |
| 11   | Investigator Recruitment Materials                   | 2018.4       |
| 11.1 | Overview of Research and Progress Plan               | 2018.4       |
| 11.2 | Investigator Qualification Certificate               | 2018.4       |
